# Supplementary material
Source: PubMed Central journal article supplement (PMC3744601)
Supplement: NIHMS463452-supplement-supplement_1.pdf [file NIHMS463452-supplement-supplement_1.pdf]

**Table 4 (online). Baseline characteristics based on placental and umbilical cord histopathology**

|                                                    | No histologic chorioamnionitis<br>n=199 | Histologic chorioamnionitis, no funisitis<br>n=38 | Histologic chorioamnionitis, stage 1 or 2 funisitis without chorionic vasculitis<br>n=26 | Histologic chorioamnionitis, stage 1 or 2 funisitis with grade 1 chorionic vasculitis<br>n=59 | Histologic chorioamnionitis, subacute necrotizing funisitis or grade 2 chorionic vasculitis<br>n=25 |
|----------------------------------------------------|-----------------------------------------|---------------------------------------------------|------------------------------------------------------------------------------------------|-----------------------------------------------------------------------------------------------|-----------------------------------------------------------------------------------------------------|
| Maternal age, yr (Mean $\pm$ SD)                   | 26 $\pm$ 6                              | 24 $\pm$ 5                                        | 25 $\pm$ 7                                                                               | 27 $\pm$ 6                                                                                    | 26 $\pm$ 4                                                                                          |
| Black race (%)                                     | 49                                      | 37                                                | 54                                                                                       | 51                                                                                            | 52                                                                                                  |
| Multiple gestation (%)                             | 30                                      | 26                                                | 12*                                                                                      | 32                                                                                            | 8*                                                                                                  |
| Preeclampsia (%)                                   | 19                                      | 5*                                                | 0 $\ddagger$                                                                             | 8*                                                                                            | 4*                                                                                                  |
| Full course of antenatal steroids (%)              | 59                                      | 63                                                | 65                                                                                       | 71                                                                                            | 64                                                                                                  |
| Antepartum antibiotics (%)                         | 72                                      | 71                                                | 96*                                                                                      | 80                                                                                            | 92*                                                                                                 |
| Clinical chorioamnionitis (%)                      | 7                                       | 40*                                               | 27*                                                                                      | 42*                                                                                           | 32*                                                                                                 |
| Rupture of membranes >18 hrs prior to delivery (%) | 36                                      | 53*                                               | 77*                                                                                      | 68*                                                                                           | 80*                                                                                                 |
| Birth weight, grams (Mean $\pm$ SD)                | 828 $\pm$ 235                           | 802 $\pm$ 237                                     | 892 $\pm$ 206                                                                            | 801 $\pm$ 221                                                                                 | 885 $\pm$ 274                                                                                       |
| Gestational age, wk (Median, IQR)                  | 27 (25-28)                              | 25 (24-26)*                                       | 26 (24-28)                                                                               | 25 (24 – 27)*                                                                                 | 25 (24 – 27)                                                                                        |
| Male sex (%)                                       | 50                                      | 50                                                | 58                                                                                       | 48                                                                                            | 48                                                                                                  |
| Apgar score at 5 min (Median, IQR)                 | 7 (6-8)                                 | 7 (4-7)                                           | 7 (7 – 8)                                                                                | 7(5-7)                                                                                        | 7 (4-8)                                                                                             |
| Cord pH (Mean $\pm$ SD)                            | 7.25 $\pm$ 0.02                         | 7.27 $\pm$ 0.12                                   | 7.32 $\pm$ 0.09                                                                          | 7.28 $\pm$ 0.08                                                                               | 7.28 $\pm$ 0.11                                                                                     |
| Respiratory distress                               | 89                                      | 82                                                | 83                                                                                       | 94                                                                                            | 92                                                                                                  |

|                                                              |    |    |    |     |    |
|--------------------------------------------------------------|----|----|----|-----|----|
| syndrome (%)                                                 |    |    |    |     |    |
| Prophylactic indomethacin (%)                                | 64 | 61 | 50 | 64  | 58 |
| Intraventricular hemorrhage Grade 3 or 4 (%) † <sup>28</sup> | 12 | 24 | 12 | 31* | 17 |
| Periventricular leukomalacia (%) †                           | 5  | 0‡ | 8  | 4   | 0‡ |

\* p <0.05 when compared to no HCA group

†n=332

‡ Statistical test not performed

**Table 5 (online). Long-term neurologic morbidity in extremely preterm infants in relation to severity of placental inflammation**

|                                                                                                    | <b>Cerebral palsy<br/>N (%)</b> | <b>Language Score &lt; 70<br/>N (%)</b> | <b>Cognitive score &lt; 70<br/>N (%)</b> | <b>Hearing impairment<br/>N (%)</b> | <b>Blindness<br/>N (%)</b> |
|----------------------------------------------------------------------------------------------------|---------------------------------|-----------------------------------------|------------------------------------------|-------------------------------------|----------------------------|
| No histologic chorioamnionitis (n=154)                                                             | 7 (4)                           | 23 (15)                                 | 11(7)                                    | 6 (4)                               | 6 (4)                      |
| Histologic chorioamnionitis, no funisitis (n=22)                                                   | 4 (18)                          | 3 (14)                                  | 3 (14)                                   | 0 (0)                               | 0 (0)                      |
| Histologic chorioamnionitis, stage 1 or 2 funisitis without chorionic vasculitis (n=21)            | 0 (0)                           | 2 (10)                                  | 2 (10)                                   | 0 (0)                               | 0 (0)                      |
| Histologic chorioamnionitis, stage 1 or 2 funisitis with grade 1 chorionic vasculitis (n=38)       | 3(8)                            | 3 (8)                                   | 5 (13)                                   | 0 (0)                               | 0 (0)                      |
| Histologic chorioamnionitis, subacute necrotizing funisitis or grade 2 chorionic vasculitis (n=15) | 1 (7)                           | 5 (33)                                  | 2 (13)                                   | 2 (13)                              | 0 (0)                      |

**Table 6 (online). Assessment of biologic interaction: fetal inflammatory response, antenatal steroids, and NDI/death**

|                            | <b>Histologic evidence of fetal inflammatory response</b> |                       |                                         |                       |
|----------------------------|-----------------------------------------------------------|-----------------------|-----------------------------------------|-----------------------|
|                            | No<br>(Overall risk: 39%)                                 |                       | Yes<br>(Overall risk: 45%)              |                       |
|                            | Incomplete course of antenatal steroids                   |                       | Incomplete course of antenatal steroids |                       |
|                            | No                                                        | Yes                   | No                                      | Yes                   |
| <b>NDI/Death, N (%)</b>    | 47 (37)                                                   | 45 (41)               | 29 (43)                                 | 20 (48)               |
| <b>Controls, N (%)</b>     | 81 (63)                                                   | 64 (59)               | 39 (57)                                 | 22 (52)               |
| <b>Risk ratio (95% CI)</b> | Reference                                                 | 1.12<br>(0.82 – 1.55) | 1.16<br>(0.81 – 1.66)                   | 1.30<br>(0.88 – 1.92) |
